# Supplementary material for: Poly(4-styrenesulfonic acid-co-maleic acid)-sodium-modified magnetic reduced graphene oxide for enhanced adsorption performance toward cationic dyes
Source: Royal Society of Chemistry journal article supplement (doi:10.1039/c5ra18255g), 2015-01-01
Supplement: c5ra18255g1.pdf [file c5ra18255g1.pdf]

## Electronic Supplementary Information

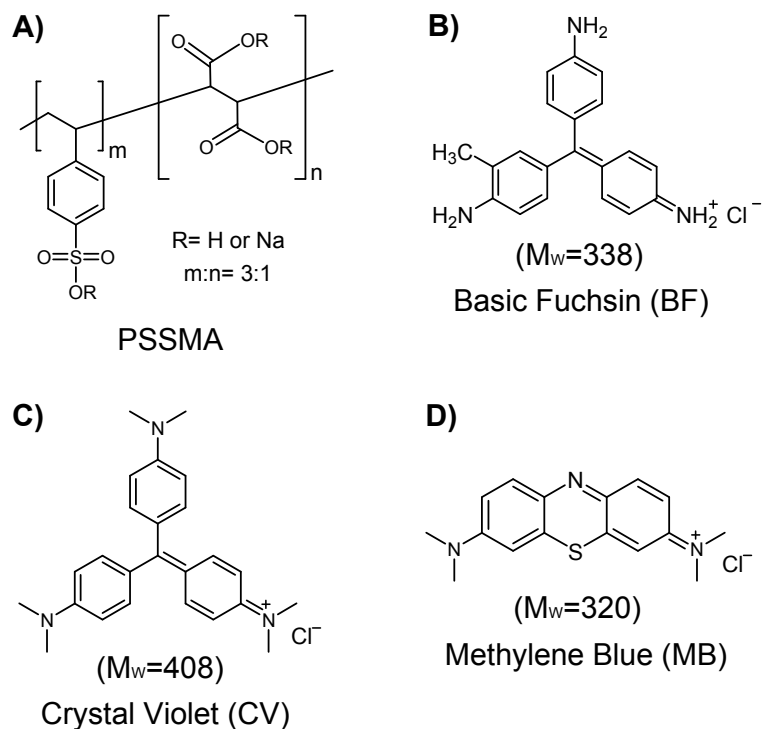

**Fig. S1.** Molecular structures of poly (4-styrenesulfonic acid-*co*-maleic acid) sodium salt (PSSMA) (A) and three cationic dyes: basic fuchsin (BF) (B), crystal violet (CV) (C) and methylene blue (MB) (D).

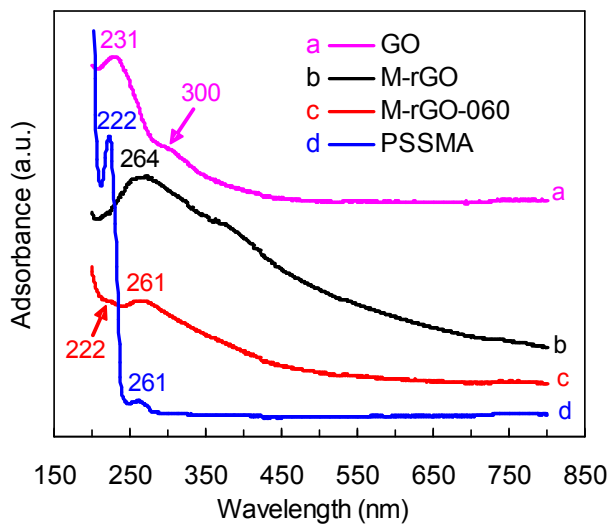

**Fig. S2.** UV-vis spectra of GO (a), M-rGO (b), M-rGO-060 (c) and PSSMA (d) dispersed in water.

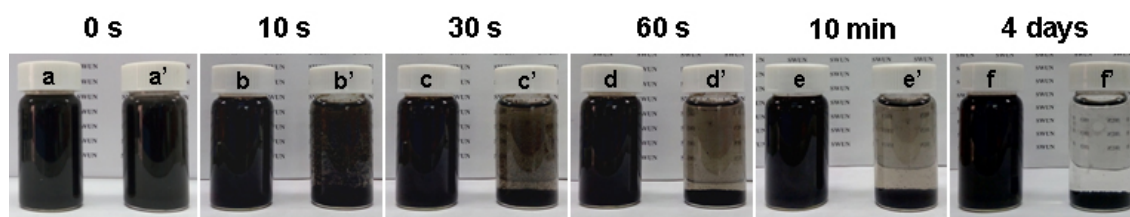

**Fig. S3.** Digital photographs of M-rGO-060 (a-f) and M-rGO (a'-f') aqueous dispersions upon storing different time at room temperature.

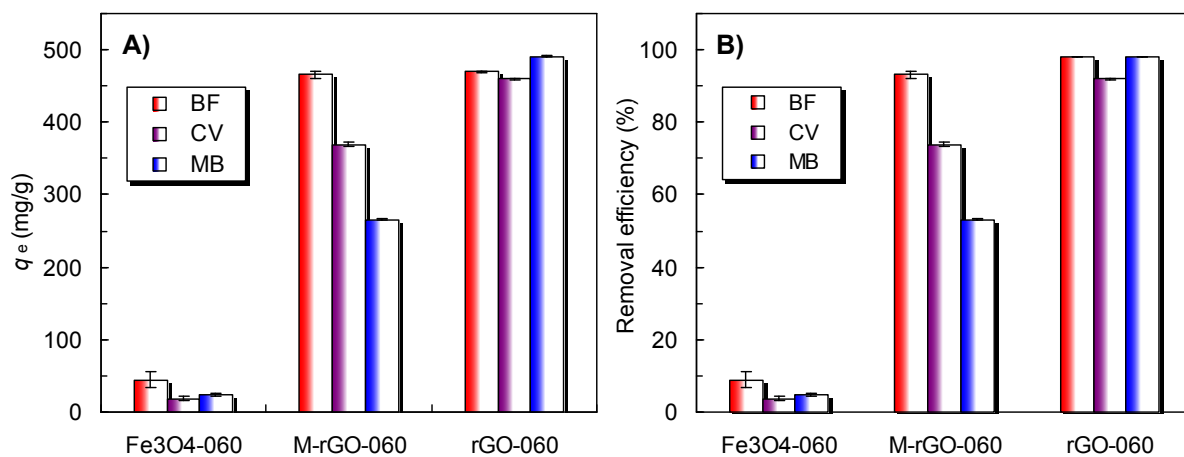

**Fig. S4.** Adsorption capacities (A) and removal efficiencies (B) of BF, CV and MB onto Fe<sub>3</sub>O<sub>4</sub>-060, M-rGO-060 and rGO-060. Condition:  $C_{BF} = C_{CV} = C_{MB} = 250$  mg/L,  $m/V = 10$  mg/20 mL,  $T = 25$  °C and contact time = 30 min.

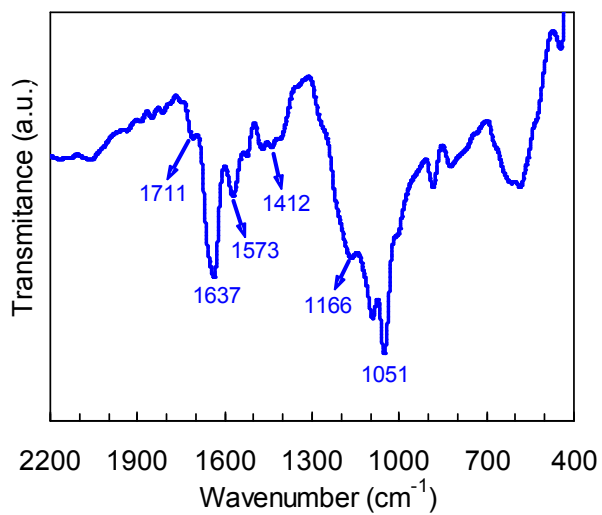

**Fig. S5.** FT-IR spectrum of rGO-060.
